# Supplementary material
Source: Springer Nature journal article supplement (https://www.springermedizin.de/resource/supplementary/13229_2013_105_MOESM14_ESM.pdf/9676270)

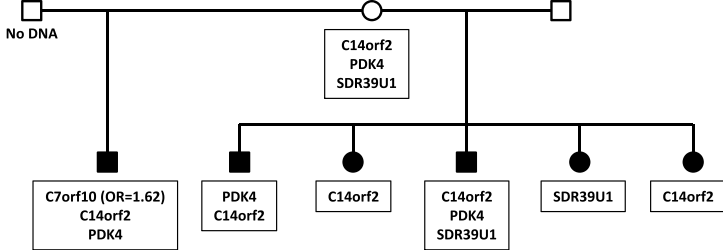

CD160 - PDZK1 - GPR89 - NBPF11/24  
Gain  
(OR=3.37)

Supplement: MOESM14 [file 9676270]
